# Supplementary material
Source: Springer Nature journal article supplement (https://www.springermedizin.de/resource/supplementary/12960_2012_335_MOESM1_ESM.pdf/9569856)
Supplement: MOESM1 [file 9569856]

# The stylized *WageIndicator* questionnaire

a worldwide, continuous, multilingual  
web-survey on work and wages with paper supplements

[www.wageindicator.org](http://www.wageindicator.org)

Kea Tijdens, University of Amsterdam / AIAS (Netherlands)

Sanne van Zijl, LadyQ data management, Werkhoven (Netherlands)

August 19, 2010

This paper presents the stylized *WageIndicator* questionnaire. The word 'stylized' implies the following:

- The stylized questionnaire includes the most important questions, and does not show all questions and all features, because this paper would otherwise count hundreds of pages
- The stylized questionnaire shows the routings for employees only and not for other employment status groups
- The stylized questionnaire does not show the conditional skips; where needed for readability, the text of the survey question has been adapted.
- The stylized questionnaire does not include project-related questions
- The stylized questionnaire does not include country-specific questions
- The stylized questionnaire refers with the word '\_list' in the **RESPONSE/VALUE** column to the several search trees, e.g. for education, region, and the like
- The stylized questionnaire does not indicate which questions are compulsory
- The stylized questionnaire does not show which questions are switched on/off per country
- The stylized questionnaire does not show how the survey is divided across web-pages
- The stylized questionnaire does not indicate which grid questions include random items

The colours indicate the following:

- Dark green with white letters indicates the headings of the survey questions
- Dark green indicates the survey questions
- Light green indicates the answers
- Grey with white letters indicates the variable names
- Pink indicates the hints or alerts

\*\*\*\*

## The stylized *WageIndicator* questionnaire

| VARIABLE NAME | SOURCE LABEL                                                                                   | RESPONSE/VALUE  |
|---------------|------------------------------------------------------------------------------------------------|-----------------|
|               | Why complete the questionnaire?                                                                |                 |
| contst71      | What is your employment status?                                                                |                 |
| HINT          | If you have more than one job, please answer the questionnaire with reference to your MAIN job |                 |
|               | Employee                                                                                       | 140             |
|               | Civil servant                                                                                  | 141             |
|               | Employee on permanent contract                                                                 | 146             |
|               | Employee on fixed-term contract                                                                | 147             |
|               | Self-employed, own-account worker, freelance                                                   | 202             |
|               | Self-employed with personnel                                                                   | 201             |
|               | Paid family worker / working for family business                                               | 103             |
|               | Working without pay (family business or farm)                                                  | 306             |
|               | Unpaid voluntary worker                                                                        | 307             |
|               | Housework                                                                                      | 308             |
|               | Looking for a job / unemployed                                                                 | 410             |
|               | Sickness benefit / incapacity for work                                                         | 515             |
|               | Retired                                                                                        | 116             |
|               | School pupil                                                                                   | 620             |
|               | Student in full-time education                                                                 | 720             |
|               | Apprentice                                                                                     | 825             |
|               | In a job creation scheme                                                                       | 130             |
|               | In military or comparable services                                                             | 131             |
|               | Retired                                                                                        | 916             |
|               | Never had a job                                                                                | 1               |
|               | Other                                                                                          | 950             |
| sex           | Are you a woman or a man?                                                                      |                 |
|               | Woman                                                                                          | 1               |
|               | Man                                                                                            | 2               |
| countryselect | In which country do you live?                                                                  | COUNTRY_list    |
| regiwocheck   | Do you work outside [COUNTRY OF SURVEY]?                                                       | y_n             |
| regihom1      | Where do you live?                                                                             | REGION_list     |
| nrofjobs      | Do you have one paid job or more?                                                              |                 |
|               | One job                                                                                        | 1               |
|               | Two jobs                                                                                       | 3               |
|               | Three or more jobs                                                                             | 4               |
| HINT          | Please complete the questionnaire for your MAIN job                                            |                 |
| controth      | Is your workplace based in another company than the one that is paying your salary?            |                 |
|               | No                                                                                             | 0               |
|               | No, I am on secondment                                                                         | 5               |
|               | Yes, I am a posted worker                                                                      | 2               |
|               | Yes, I am a temporary agency worker                                                            | 1               |
|               | Yes, I am working for a labour contractor                                                      | 6               |
|               | Yes, other                                                                                     | 3               |
| HINT          | Please complete the questionnaire for your current workplace                                   |                 |
| occupai       | What is your occupation?                                                                       | OCCUPATION_list |
| HINT          | If your occupation is not in the list, please select the one that comes closest                |                 |
| octype        | Do you want to specify your occupation in greater detail?                                      |                 |
|               | No, the job title is alright                                                                   | 1               |
|               | Assistant                                                                                      | 2               |
|               | Junior                                                                                         | 3               |
|               | Apprentice                                                                                     | 4               |
|               | Trainee                                                                                        | 5               |
|               | Trainer, training responsibilities                                                             | 6               |

| VARIABLE NAME | SOURCE LABEL                                                              | RESPONSE/VALUE |
|---------------|---------------------------------------------------------------------------|----------------|
|               | Foreman, forewoman                                                        | 7              |
|               | Senior                                                                    | 8              |
|               | Team leader                                                               | 9              |
|               | Supervisor                                                                | 10             |
|               | Head                                                                      | 11             |
|               | Other                                                                     | 99             |
| occtext       | If you want to specify your occupation more accurately, please do so here | text           |
| depmale       | Are co-workers in similar positions mostly male?                          | y_n            |
| supv0         | Do you have a supervisory position?                                       | y_n            |
| HINT          | This applies to people working directly under your supervision            |                |
| SUPV          | How many people work directly under your supervision?                     | 0-10000        |
| SUPVWOM       | How many of these people are women?                                       | 0-10000        |
| sector        | What is your main business activity?                                      | INDUSTRY_list  |
| firmsize      | How many people are employed at your place of work?                       |                |
| HINT          | Applicable to your establishment                                          |                |
|               | 0 (self-employed without personnel)                                       | 0              |
|               | 1 - 4                                                                     | 11             |
|               | 5 - 9                                                                     | 12             |
|               | 10 - 20                                                                   | 2              |
|               | 20 - 50                                                                   | 3              |
|               | 50 - 100                                                                  | 4              |
|               | 100 - 200                                                                 | 5              |
|               | 200 - 500                                                                 | 6              |
|               | 500 - 1.000                                                               | 7              |
|               | 1.000 - 2.000                                                             | 8              |
|               | 2.000 - 5.000                                                             | 9              |
|               | 5.000 or more                                                             | 10             |
| firmfema      | What percentage of employees are female?                                  |                |
| HINT          | Applicable to your establishment                                          |                |
|               | 0 - 20 %                                                                  | 1              |
|               | 20 - 40 %                                                                 | 2              |
|               | 40 - 60 %                                                                 | 3              |
|               | 60 - 80 %                                                                 | 4              |
|               | 80 - 100 %                                                                | 5              |
|               | I don't know                                                              | -7             |
|               | How many employees in your organisation are                               |                |
| HINT          | Applicable to your establishment                                          |                |
| ILC013a       | Under age 25                                                              |                |
|               | 0 - 20 %                                                                  | 1              |
|               | 20 - 40 %                                                                 | 2              |
|               | 40 - 60 %                                                                 | 3              |
|               | 60 - 80 %                                                                 | 4              |
|               | 80 - 100 %                                                                | 5              |
|               | I don't know                                                              | -7             |
| ILC013b       | Between 25 and 50                                                         |                |
|               | 0 - 20 %                                                                  | 1              |
|               | 20 - 40 %                                                                 | 2              |
|               | 40 - 60 %                                                                 | 3              |
|               | 60 - 80 %                                                                 | 4              |
|               | 80 - 100 %                                                                | 5              |
|               | I don't know                                                              | -7             |
| ILC013c       | Over 50                                                                   |                |
|               | 0 - 20 %                                                                  | 1              |
|               | 20 - 40 %                                                                 | 2              |
|               | 40 - 60 %                                                                 | 3              |
|               | 60 - 80 %                                                                 | 4              |
|               | 80 - 100 %                                                                | 5              |
|               | I don't know                                                              | -7             |

| VARIABLE NAME | SOURCE LABEL                                                                                                                                        | RESPONSE/VALUE   |
|---------------|-----------------------------------------------------------------------------------------------------------------------------------------------------|------------------|
| firmloca      | Is your organisation established in more than one location?                                                                                         |                  |
|               | No                                                                                                                                                  | 0                |
|               | Yes, in 1 city / municipality                                                                                                                       | 1                |
|               | Yes, in 1 region                                                                                                                                    | 2                |
|               | Yes, in 2 or more regions                                                                                                                           | 3                |
|               | Yes, throughout the country                                                                                                                         | 4                |
|               | Yes, throughout the country and abroad                                                                                                              | 5                |
|               | Yes, but only abroad                                                                                                                                | 6                |
| firmowne      | Is your organisation domestic- or foreign owned?                                                                                                    |                  |
|               | Wholly domestic owned                                                                                                                               | 1                |
|               | Partly domestic owned, partly foreign owned                                                                                                         | 2                |
|               | Wholly foreign owned                                                                                                                                | 3                |
|               | I don't know                                                                                                                                        | -7               |
|               | Not applicable                                                                                                                                      | -8               |
| firmow01      | Please select the country where the foreign investment comes from                                                                                   | COUNTRY_list     |
| firmpriv      | Do you work ...                                                                                                                                     |                  |
|               | In the private sector                                                                                                                               | 1                |
|               | In the public sector                                                                                                                                | 2                |
|               | In the not-for-profit sector                                                                                                                        | 3                |
|               | In a co-operative organisation                                                                                                                      | 7                |
|               | In a family business                                                                                                                                | 8                |
|               | I don't know                                                                                                                                        | -7               |
|               | Other                                                                                                                                               | 99               |
| caocate3      | Is your occupational category ...                                                                                                                   |                  |
|               | White collar worker (clerical, administrative)                                                                                                      | 2                |
|               | White collar worker (with exception of civil servants)                                                                                              | 8                |
|               | Blue collar worker                                                                                                                                  | 1                |
|               | Civil servant                                                                                                                                       | 5                |
|               | Apprentice, trainee                                                                                                                                 | 4                |
|               | Professional, managerial or technical staff                                                                                                         | 3                |
|               | Contractual                                                                                                                                         | 6                |
|               | Other                                                                                                                                               | 99               |
| caofirm1      | Are you covered by a collective agreement about wages?                                                                                              |                  |
|               | Yes                                                                                                                                                 | 1                |
|               | Yes, but I myself am not covered                                                                                                                    | 5                |
|               | No                                                                                                                                                  | 0                |
|               | I don't know                                                                                                                                        | -7               |
| caofir91      | If yes, are your wages predominantly determined by this agreement?                                                                                  | y_n_dk           |
| caofirm8      | If yes, please, can you specify the collective agreement?                                                                                           |                  |
|               | Agreement at company level                                                                                                                          | 2                |
|               | Sectoral level agreement                                                                                                                            | 1                |
|               | Governement directive / wage board                                                                                                                  | 3                |
|               | Municipal or intermunicipal level agreement                                                                                                         | 20               |
|               | Regional level agreement                                                                                                                            | 22               |
|               | National level agreement                                                                                                                            | 23               |
|               | Combination of contracts                                                                                                                            | 24               |
|               | I don't know                                                                                                                                        | -7               |
| caofirm9      | Are fringe benefits negotiated as well in this agreement?                                                                                           | y_n_dk           |
| educat        | What is your highest level of education?                                                                                                            | EDUCATION_list   |
| HINT          | If you are currently studying, please indicate the highest level of education you reached. If you went to school abroad enter the equivalent level. |                  |
| yybirth       | In which year were you born?                                                                                                                        | 1930-YEAR_NOW-10 |
| yyeduca       | In which year did you finish continuous full-time education?                                                                                        | 1950-YEAR_NOW+10 |
| HINT          | PhD graduates, please complete the year you obtained your PhD                                                                                       |                  |
| edujobtr      | How much time is needed to become fully effective in your job for someone with your qualifications?                                                 |                  |
|               | No training period required                                                                                                                         | 0                |
|               | 1 - 2 days                                                                                                                                          | 1                |

| VARIABLE NAME | SOURCE LABEL                                                                                                                   | RESPONSE/VALUE |
|---------------|--------------------------------------------------------------------------------------------------------------------------------|----------------|
|               | 3 - 6 days                                                                                                                     | 2              |
|               | 1 - 4 weeks                                                                                                                    | 3              |
|               | 1 - 3 months                                                                                                                   | 4              |
|               | 3 - 6 months                                                                                                                   | 5              |
|               | 0.5 - 1 year                                                                                                                   | 6              |
|               | 1 year or more                                                                                                                 | 7              |
|               | I don't know                                                                                                                   | -7             |
| training      | Over the past 12 months, how much training did you get paid for or provided by your EMPLOYER, in order to improve your skills? |                |
|               | None                                                                                                                           | 0              |
|               | 1 - 2 days                                                                                                                     | 1              |
|               | 3 - 6 days                                                                                                                     | 2              |
|               | 1 - 2 weeks                                                                                                                    | 3              |
|               | 3 - 4 weeks                                                                                                                    | 4              |
|               | 1 - 2 months                                                                                                                   | 5              |
|               | 2 months or more                                                                                                               | 6              |
|               | Not applicable                                                                                                                 | -8             |
| trainin1      | Over the past 12 months, how much training have you received, paid for YOURSELF in order to improve your skills?               |                |
|               | None                                                                                                                           | 0              |
|               | 1 - 2 days                                                                                                                     | 1              |
|               | 3 - 6 days                                                                                                                     | 2              |
|               | 1 - 2 weeks                                                                                                                    | 3              |
|               | 3 - 4 weeks                                                                                                                    | 4              |
|               | 1 - 2 months                                                                                                                   | 5              |
|               | 2 months or more                                                                                                               | 6              |
|               | Not applicable                                                                                                                 | -8             |
| educapp0      | Have you ever been on an apprenticeship?                                                                                       |                |
|               | No                                                                                                                             | 0              |
|               | Yes, during my full-time education                                                                                             | 1              |
|               | Yes, following my full-time education                                                                                          | 2              |
|               | Yes, but not immediately following my full-time education                                                                      | 3              |
| educlev1      | Do your qualifications match your job?                                                                                         |                |
|               | Yes                                                                                                                            | 1              |
|               | No, I am overqualified for my job                                                                                              | 3              |
|               | No, I am underqualified for my job                                                                                             | 2              |
|               | I don't know                                                                                                                   | -7             |
| eduexpe       | If you are underqualified, does your experience compensate for that?                                                           |                |
|               | No                                                                                                                             | 0              |
|               | Yes, to a minor degree                                                                                                         | 1              |
|               | Yes, more or less                                                                                                              | 2              |
|               | Yes, almost fully                                                                                                              | 3              |
|               | Yes, completely                                                                                                                | 4              |
|               | I don't know                                                                                                                   | -7             |
| contrac5      | Do you have a permanent contract?                                                                                              | y_n            |
| contract      | If not, what kind of employment contract do you have?                                                                          |                |
|               | Fixed-term contract with the prospect of permanent employment                                                                  | 2              |
|               | Fixed-term contract without the prospect of permanent employment                                                               | 3              |
|               | Apprentice                                                                                                                     | 6              |
|               | On-call contract                                                                                                               | 4              |
|               | Community work scheme / subsidised employment                                                                                  | 14             |
|               | In community or military service                                                                                               | 15             |
|               | Contract with temp agency                                                                                                      | 7              |
|               | Seasonal work                                                                                                                  | 9              |
|               | Fixed-term contract to cover another worker                                                                                    | 21             |
|               | Year contract                                                                                                                  | 30             |
|               | Contractor for labour with equipment or vehicle                                                                                | 31             |
|               | Combination of contracts                                                                                                       | 11             |
|               | Other type of contract                                                                                                         | 99             |

| VARIABLE NAME | SOURCE LABEL                                                                                                                    | RESPONSE/VALUE |
|---------------|---------------------------------------------------------------------------------------------------------------------------------|----------------|
| hrshisto      | Do you work full-time?                                                                                                          | y_n            |
| hrsdayp2      | How many days a week do you usually work?                                                                                       | 1-7            |
| hrscont3      | Are your working hours agreed with your employer?                                                                               |                |
|               | Yes, in writing                                                                                                                 | 1              |
|               | Yes, verbally                                                                                                                   | 2              |
|               | No                                                                                                                              | 0              |
|               | Not applicable                                                                                                                  | -8             |
| hrscontr      | How many hours a week do you work under the terms of your contract?                                                             | 0.15-100.45    |
| hrsreal0      | Do you usually work the number of hours laid down in your contract?                                                             |                |
|               | Yes                                                                                                                             | 1              |
|               | No, I work less hours                                                                                                           | 2              |
|               | No, I work more hours                                                                                                           | 3              |
|               | Not applicable                                                                                                                  | -8             |
| hrsreal       | How many hours a week do you usually work?                                                                                      | 0.15-100.45    |
|               | About your working hours                                                                                                        |                |
| tiroster      | I work shifts or irregular hours                                                                                                | y_n            |
| tisatday      | I regularly work on Saturdays                                                                                                   | y_n            |
| tisunday      | I regularly work on Sundays                                                                                                     | y_n            |
| tievning      | I regularly work in the evenings                                                                                                | y_n            |
| timornin      | In the past month, I have begun with my working day before six o'clock in the morning                                           | y_n            |
| tinight       | In the past month, I have ended with my working day after midnight                                                              | y_n            |
| wageper0      | Do you receive your salary per [MONTH]?                                                                                         | y_n            |
| wageboth      | Do you know your GROSS and your NET wage?                                                                                       |                |
|               | Yes, my gross and my net wage                                                                                                   | 1              |
|               | Only my gross wage                                                                                                              | 2              |
|               | Only my net wage                                                                                                                | 3              |
|               | What was your last wage?                                                                                                        |                |
| HINT          | This applies to your LAST wage including allowances, variable income elements, holiday allowance, expense allowance or overtime |                |
| wagegr1       | Gross wage [VALUTA]                                                                                                             | amount         |
| wagene1       | Net wage [VALUTA]                                                                                                               | amount         |
| wagetext      | If you want to specify your payment period, please do so here                                                                   | text           |
| wageregu      | Did you receive your last wage                                                                                                  |                |
|               | [Bank account / By cheque / Bank draft]                                                                                         | 1              |
|               | Cash in hand                                                                                                                    | 2              |
|               | In kind                                                                                                                         | 4              |
|               | Combination                                                                                                                     | 5              |
| wagetax1      | Do you contribute to social security?                                                                                           | y_n            |
| wagetax2      | Is your contribution to social security calculated on the basis of your whole wage or only on a part of it?                     |                |
|               | On the whole                                                                                                                    | 1              |
|               | On a part                                                                                                                       | 2              |
|               | I don't know                                                                                                                    | -7             |
|               | Not applicable                                                                                                                  | -8             |
|               | More about your wage                                                                                                            |                |
| wageonti      | You received your last wage on time                                                                                             | y_n_na         |
| wageincr      | I have received a pay raise in the past 12 months                                                                               | y_n_na         |
| wagetop       | I have reached the top of my grade                                                                                              | y_n_na         |
| wageask       | I have asked for a pay raise in the past 12 months                                                                              | y_n_na         |
| paydiscu      | I have had a frank discussion about my pay with my employer or supervisor in the past 12 months                                 | y_n_na         |
| wagevary      | My wage varies from month to month                                                                                              | y_n_na         |
| seekwage      | I could earn more with another employer                                                                                         | y_n_na         |
| wageperf      | I would prefer if my wage depended more on my performance                                                                       | y_n_na         |
| seeeasy       | I could easily find another job                                                                                                 | y_n_na         |
| caoimpo1      | I think it is important that my wages are covered by a collective agreement                                                     | y_n_na         |
|               | Did your last wage include any of the following allowances? If so, how much?                                                    |                |

| VARIABLE NAME | SOURCE LABEL                                                                                          | RESPONSE/VALUE |
|---------------|-------------------------------------------------------------------------------------------------------|----------------|
| washifts      | Shift / unsocial hours / weekend allowance                                                            | y_n_na_amount  |
| waovrtm       | Overtime bonus / premium                                                                              | y_n_na_amount  |
| wadirty       | Dirty or dangerous work allowance / Inconvenience or hardship allowance                               | y_n_na_amount  |
| watips        | Tips                                                                                                  | y_n_na_amount  |
| wasenior      | Seniority / managerial bonus                                                                          | y_n_na_amount  |
| watarget      | Target related allowance / Personal performance allowance                                             | y_n_na_amount  |
| waperfom      | Commission                                                                                            | y_n_na_amount  |
| waannual      | Annual bonus                                                                                          | y_n_na_amount  |
| wayearnd      | End-of-year bonus, Christmas bonus                                                                    | y_n_na_amount  |
| wahollid      | Holiday allowance                                                                                     | y_n_na_amount  |
| wagroupb      | Group performance allowance / Team or departmental bonus                                              | y_n_na_amount  |
| wacommnt      | Commuting / public transport allowance                                                                | y_n_na_amount  |
| waprofit      | Profit sharing                                                                                        | y_n_na_amount  |
| wacityal      | City compensatory allowance                                                                           | y_n_na_amount  |
| waother       | Other allowances                                                                                      | y_n_na_amount  |
|               | In the past 12 months, have you been a participant in the following work-related schemes or benefits? |                |
| frexpe61      | Arrangements regarding expences                                                                       | y_n_na         |
| frcar61       | Transport arrangements (lease car, company car, commuting costs)                                      | y_n_na         |
| frlapt61      | PC at home / laptop                                                                                   | y_n_na         |
| frdayc61      | Children's day-care arrangements                                                                      | y_n_na         |
| frmedi61      | Health insurance arrangements                                                                         | y_n_na         |
| frpens61      | Pension schemes                                                                                       | y_n_na         |
| frsavs61      | Savings schemes                                                                                       | y_n_na         |
| frunem61      | Unemployment schemes                                                                                  | y_n_na         |
| frshar61      | Share options arrangements                                                                            | y_n_na         |
| frhous61      | Contribution to lodging / costs related housing                                                       | y_n_na         |
| frmort61      | Lower rate of interest on mortgage                                                                    | y_n_na         |
| frspor61      | Sports facilities                                                                                     | y_n_na         |
| pacante       | Canteen/food voucher                                                                                  | y_n_na         |
| frgdik61      | Benefits in kind (vouchers and discounted goods and services)                                         | y_n_na         |
| frothe61      | Other additions to pay from your employer over the past 12 months                                     | y_n_na         |
|               | Do you receive any of the following annual bonuses?                                                   |                |
| frnhol61      | Holiday allowance                                                                                     | y_n_na         |
| frnend61      | End-of-year bonus                                                                                     | y_n_na         |
| frnpro61      | Profit share                                                                                          | y_n_na         |
| frncoo61      | Payments from balance surplus in co-operatives                                                        | y_n_na         |
| frnfes61      | Festival bonus                                                                                        | y_n_na         |
| frnper61      | Performance bonus                                                                                     | y_n_na         |
| frnoth61      | Other annual bonus                                                                                    | y_n_na         |
| yyfstjob      | What year did you start your first job?                                                               | 1950_YEAR_NOW  |
| jobhist       | How many times have you changed your employer since?                                                  | 1-100          |
| yycuemp0      | In which year did you join your current employer?                                                     | 1950_YEAR_NOW  |
| jobhist2      | How many positions have you occupied with your current employer, including your current job?          | 1-10 or more   |
| yycuposi      | In which year did you attain your current position?                                                   | 1950_YEAR_NOW  |
|               | In your organisation                                                                                  |                |
| dephisto      | Have you been working in different departments?                                                       | y_n_na         |
| jobpromo      | Have you been promoted?                                                                               | y_n_na         |
|               | Your employment history                                                                               |                |
| breaknr       | Since your first job, have you ever been without a job?                                               | y_n            |
| break0        | If yes, how many times have you been without a job?                                                   | 1-100          |
| breakpe1      | If yes, how long have you been without a job?                                                         |                |
|               | 0 - 3 months                                                                                          | 1              |
|               | 3 - 6 months                                                                                          | 2              |
|               | 0.5 - 1 year                                                                                          | 3              |
|               | 1 year or more                                                                                        | 4              |
| break         | In which year did you stop working and in which year did you return to work?                          | 1950_YEAR_NOW  |

| VARIABLE NAME | SOURCE LABEL                                                                                                | RESPONSE/VALUE    |
|---------------|-------------------------------------------------------------------------------------------------------------|-------------------|
| ILC019        | Were you during the last 12 months absent at any time due to illness, accident or for other health reasons? | y_n_na            |
| ILC020        | If yes, how often were you absent during the last 12 months?                                                | 0-100             |
| ILC021        | If yes, how many DAYS were you absent during the last 12 months?                                            | 1-360             |
| memtrad1      | Member of a trade union?                                                                                    | y_n_na            |
| memdele1      | Member of a works council                                                                                   | y_n_na            |
| memstaff      | Member of a staff association                                                                               | y_n_na            |
| memproff      | Member of a professional organisation                                                                       | y_n_na            |
| memtrd61      | Of which trade union are you a member?                                                                      | TRADE UNION_list  |
| regiwor0      | Is your workplace in the same region where you live?                                                        |                   |
|               | Yes                                                                                                         | 1                 |
|               | Yes, my workplace and my home are in the same building.                                                     | 2                 |
|               | No                                                                                                          | 0                 |
|               | I am a mobile worker covering more regions.                                                                 | 3                 |
|               | How long does it take to commute from your home to work?                                                    |                   |
| commtime      | Time in minutes (one way)                                                                                   |                   |
|               | 0 / Not applicable                                                                                          | 0                 |
|               | 0 - 15 min.                                                                                                 | 1                 |
|               | 15 - 30 min.                                                                                                | 2                 |
|               | 30 - 45 min.                                                                                                | 3                 |
|               | 45 - 60 min.                                                                                                | 4                 |
|               | 1 hour - 1 hour 15                                                                                          | 5                 |
|               | 1 hour 15 - 1 hour 30                                                                                       | 6                 |
|               | 1 hour 30 - 2 hours                                                                                         | 7                 |
|               | 2 hours or more                                                                                             | 8                 |
| commdist      | Distance in kilometers (one way)                                                                            |                   |
|               | 0 / Not applicable                                                                                          | 0                 |
|               | 0 - 5                                                                                                       | 1                 |
|               | 5 - 10                                                                                                      | 2                 |
|               | 10 - 15                                                                                                     | 3                 |
|               | 15 - 20                                                                                                     | 4                 |
|               | 20 - 25                                                                                                     | 5                 |
|               | 25 - 50                                                                                                     | 6                 |
|               | 50 - 75                                                                                                     | 7                 |
|               | 75 or more                                                                                                  | 8                 |
|               | How do you travel to work?                                                                                  |                   |
| comcar        | By car                                                                                                      | checkbox          |
| combike       | By bicycle                                                                                                  | checkbox          |
| commoped      | By moped / scooter                                                                                          | checkbox          |
| combus        | By bus, tram or underground                                                                                 | checkbox          |
| comtrain      | By train                                                                                                    | checkbox          |
| comfoot       | On foot                                                                                                     | checkbox          |
| comcomt       | Company provides transport                                                                                  | checkbox          |
| comhome       | I work from home                                                                                            | checkbox          |
| comother      | Other                                                                                                       | checkbox          |
| cobself1      | Were you born in [COUNTRY OF SURVEY]?                                                                       | y_n               |
| cobself       | If no, in which country were you born?                                                                      | COUNTRY_list      |
| cobmoth1      | Was your mother born in the same country as you?                                                            | y_n_dk            |
| cobmothe      | If no, in which country was your mother born?                                                               | COUNTRY_list      |
| cobfath1      | Was your father born in the same country as you?                                                            | y_n_dk            |
| cobfathe      | If no, in which country was your father born?                                                               | COUNTRY_list      |
| yyarriva      | In which year did you come to live in [COUNTRY OF SURVEY] and why did you come here?                        | 1950_YEAR_NOW     |
| cobreaso      | Came because of                                                                                             |                   |
|               | Economic reasons                                                                                            | 4                 |
|               | Family reasons                                                                                              | 1                 |
|               | Asylum                                                                                                      | 2                 |
|               | Other                                                                                                       | 99                |
| cobethg1      | To which [ethnic/social/minority] group do you belong?                                                      | ETHNIC GROUP_list |



| VARIABLE NAME | SOURCE LABEL                                                                                | RESPONSE/VALUE     |
|---------------|---------------------------------------------------------------------------------------------|--------------------|
| coblang1      | Which language do you usually speak at home?                                                | LANGUAGE_list      |
| regihom2      | Where do you live?                                                                          | REGION_list        |
| hhnrmemb      | How many people live in your household?                                                     | 1-6 or more        |
| hhinconr      | How many people in your household have an income from work, benefits or other sources?      | 0-6 or more        |
|               | With whom do you live in your household?                                                    |                    |
| hhpartn1      | Partner                                                                                     | y_n                |
| hhchild       | One or more children                                                                        | y_n                |
| hhchildp      | One or more children, but only for part of the week/year                                    | y_n                |
| hhgchild      | Grandchildren                                                                               | y_n                |
| hhstate7      | Parents (in-law)                                                                            | y_n                |
| hhstat10      | Grandparents (in-law)                                                                       | y_n                |
| hhstat21      | Brothers or sisters (in-law)                                                                | y_n                |
| hhstat13      | Joint family                                                                                | y_n                |
| hhstat20      | Other relatives                                                                             | y_n                |
| hhstat12      | House help                                                                                  | y_n                |
| hhstat22      | Employer                                                                                    | y_n                |
| hhlivein      | Live-in friend                                                                              | y_n                |
| hhstate8      | Non-family members                                                                          | y_n                |
| hhstat7       | What is your current marital status?                                                        |                    |
|               | Married                                                                                     | 1                  |
|               | Widowed                                                                                     | 2                  |
|               | Divorced                                                                                    | 3                  |
|               | Never married                                                                               | 4                  |
| chld          | Do you have children?                                                                       | y_n                |
|               | If yes, how many children do you have?                                                      |                    |
| chldhome      | Living at home                                                                              | 0-6_dk             |
| chldout       | Not living at home                                                                          | 0-6_dk             |
|               | In what year are your children born?                                                        |                    |
| morechld      | Eldest child                                                                                | 1950_YEAR_NOW      |
| yyyochld      | Youngest child                                                                              | 1950_YEAR_NOW      |
| ILC018        | How is your health in general? Would you say it is ...                                      |                    |
|               | Very good                                                                                   | 1                  |
|               | Good                                                                                        | 2                  |
|               | Fair                                                                                        | 3                  |
|               | Bad                                                                                         | 4                  |
|               | Very bad                                                                                    | 5                  |
|               | Finally, how satisfied are you with ...                                                     |                    |
| satjob        | Your job                                                                                    | satisfaction5pt_na |
| bgsatjob      | Your work                                                                                   | satisfaction5pt_na |
| wagesat2      | Your pay                                                                                    | satisfaction5pt_na |
| bgwagesa      | Your income / profit                                                                        | satisfaction5pt_na |
| commsat       | Your commuting time                                                                         | satisfaction5pt_na |
| satcombi      | Your combination of work and family life                                                    | satisfaction5pt_na |
| satsecur      | Your job security                                                                           | satisfaction5pt_na |
| satenvir      | Your work environment                                                                       | satisfaction5pt_na |
| sathrs        | Your working hours                                                                          | satisfaction5pt_na |
| satcoll       | Your relationship with your colleagues at work                                              | satisfaction5pt_na |
| satupvi       | Your relationship with your superiors at work                                               | satisfaction5pt_na |
|               | Which of the following best describes your use of the internet at home over the past month? |                    |
|               | Every day or almost every day                                                               | 1                  |
|               | A couple of times a week                                                                    | 2                  |
|               | A couple of times a month                                                                   | 3                  |
|               | Once a month or less                                                                        | 4                  |
|               | Did not use the internet et all                                                             | 5                  |
|               | I don't know                                                                                | -7                 |
| satlife       | All things considered, how satisfied are you with your life as-a-whole now?                 |                    |
|               | 1 - Dissatisfied                                                                            | 1                  |

| VARIABLE NAME | SOURCE LABEL                                                                                                                       | RESPONSE/VALUE   |
|---------------|------------------------------------------------------------------------------------------------------------------------------------|------------------|
|               | 2                                                                                                                                  | 2                |
|               | 3                                                                                                                                  | 3                |
|               | 4                                                                                                                                  | 4                |
|               | 5                                                                                                                                  | 5                |
|               | 6                                                                                                                                  | 6                |
|               | 7                                                                                                                                  | 7                |
|               | 8                                                                                                                                  | 8                |
|               | 9                                                                                                                                  | 9                |
|               | 10 - Satisfied                                                                                                                     | 10               |
|               | I don't know                                                                                                                       | -7               |
|               | Thanks for completing part 1 of the questionnaire!                                                                                 |                  |
| HINT          | You don't have to complete part 2 of our salary questionnaire.<br>But if you do it anyhow, we double your chance to win the prize! |                  |
| part_2        | Please, take me to part 2!                                                                                                         | y_n              |
|               | More about your occupation                                                                                                         |                  |
| contrac4      | In your second job, are you ...                                                                                                    |                  |
|               | Employee                                                                                                                           | 140              |
|               | Self-employed, own-account worker, freelance                                                                                       | 202              |
|               | Family worker / working for family business                                                                                        | 103              |
|               | Trainee / apprentice                                                                                                               | 825              |
|               | Atypical labour contracts (temporary, interim, project, occasional)                                                                | 918              |
|               | Regular wage earner                                                                                                                | 944              |
|               | Self-employed and wage earner                                                                                                      | 205              |
|               | Unpaid family worker                                                                                                               | 306              |
|               | Unpaid non-family worker                                                                                                           | 307              |
|               | Other                                                                                                                              | 950              |
| hrssecon      | How many hours a week do you usually work in your second job?                                                                      | 0.15-100.45      |
|               | Your opinion                                                                                                                       |                  |
| jobene61      | I have sufficient energy to do my job                                                                                              | agree5pt_na      |
| spvsup61      | I have sufficient support from my supervisor                                                                                       | agree5pt_na      |
| occho61       | I am happy to work in this occupation                                                                                              | agree5pt_na      |
| jobcha61      | My job is sufficiently varied                                                                                                      | agree5pt_na      |
| jobint61      | Over the past 12 months, my job has become more interesting                                                                        | agree5pt_na      |
|               | About your job                                                                                                                     |                  |
| constr61      | How often do you find your job stressful?                                                                                          | neverdaily5pt_na |
| conhea61      | How often do you work in unhealthy conditions?                                                                                     | neverdaily5pt_na |
| condan61      | How often do you work in dangerous conditions?                                                                                     | neverdaily5pt_na |
| traiww61      | How often do you find training for your job would be worthwhile?                                                                   | neverdaily5pt_na |
| conphy61      | How often do you come home from work physically exhausted?                                                                         | neverdaily5pt_na |
| conmen61      | How often do you come home from work mentally exhausted?                                                                           | neverdaily5pt_na |
| jobaut61      | How often do you organise your own work tasks?                                                                                     | neverdaily5pt_na |
| conbor61      | How often do you find your job boring?                                                                                             | neverdaily5pt_na |
| jobrot62      | How often do you take over tasks assigned to your co-workers?                                                                      | neverdaily5pt_na |
| jobrou62      | How often do you find your job involves monotonous tasks?                                                                          | neverdaily5pt_na |
| jobsec62      | How often do you worry about your job security?                                                                                    | neverdaily5pt_na |
|               | More about your education and training                                                                                             |                  |
| firmsiz2      | How many people are employed by the whole organisation in your country?                                                            |                  |
|               | Less than 10                                                                                                                       | 1                |
|               | 10 - 20                                                                                                                            | 2                |
|               | 20 - 50                                                                                                                            | 3                |
|               | 50 - 100                                                                                                                           | 4                |
|               | 100 - 200                                                                                                                          | 5                |
|               | 200 - 500                                                                                                                          | 6                |
|               | 500 - 1,000                                                                                                                        | 7                |
|               | 1,000 - 2,000                                                                                                                      | 8                |
|               | 2,000 - 5,000                                                                                                                      | 9                |
|               | 5,000 or more                                                                                                                      | 10               |
|               | I don't know                                                                                                                       | -7               |
| firmfem1      | What percentage of employees is female?                                                                                            |                  |

| VARIABLE NAME | SOURCE LABEL                                                                              | RESPONSE/VALUE   |
|---------------|-------------------------------------------------------------------------------------------|------------------|
|               | 0 - 20 %                                                                                  | 1                |
|               | 20 - 40 %                                                                                 | 2                |
|               | 40 - 60 %                                                                                 | 3                |
|               | 60 - 80 %                                                                                 | 4                |
|               | 80 - 100 %                                                                                | 5                |
|               | I don't know                                                                              | -7               |
|               | In your workplace ...                                                                     |                  |
| jobalone      | You work alone                                                                            | y_n_na           |
| depteam       | Most of your work is organised in teams                                                   | y_n_na           |
| jobnocow      | You deal directly with people who are not co-workers                                      | y_n_na           |
| jobfrien      | You consider some of your co-workers to be friends                                        | y_n_na           |
| supvfema      | Your direct supervisor is a woman                                                         | y_n_na           |
| compjob       | You work with a computer                                                                  | y_n_na           |
| comepequi     | You work with other automated equipment                                                   | y_n_na           |
| compinet      | You use the Internet                                                                      | y_n_na           |
| depdisc       | It is possible to discuss changes in work with your management                            | y_n_na           |
| depmach1      | Machines/equipment are in a good state of repair                                          | y_n_na           |
| depstaf3      | Staffing levels are sufficient                                                            | y_n_na           |
| depconf3      | Conflicts regularly occur                                                                 | y_n_na           |
| depwork1      | Work is well organised                                                                    | y_n_na           |
| depinfo1      | You are well informed about the work you have to do                                       | y_n_na           |
| depinfo2      | You are well informed about what is going on                                              | y_n_na           |
| supvclo1      | You are closely supervised                                                                | y_n_na           |
| wagequa3      | Women and men have equal opportunities                                                    | y_n_na           |
| firmrela      | Relations between management and employees are good                                       | y_n_na           |
| firmresp      | You are treated with respect                                                              | y_n_na           |
| firmtrust     | You trust the management                                                                  | y_n_na           |
| firmprom      | Promotions are handled fairly                                                             | y_n_na           |
|               | Your opinion                                                                              |                  |
| firmgro1      | Over the past 12 months, the workforce has been ...                                       | increasing5pt_na |
| firmgro2      | In the next 12 months, the workforce is likely to be ...                                  | increasing5pt_na |
| firmhie1      | Over the past 12 months, the number of managers has been ...                              | increasing5pt_na |
| firmhie2      | In the next 12 months, the number of managers is likely to be ...                         | increasing5pt_na |
|               | In your organization ...                                                                  |                  |
| firmrep1      | Is there a trade union representative?                                                    | y_n_na           |
| firmrep2      | Is there a shop steward system?                                                           | y_n_na           |
| firmrep3      | Is there a plant / unitary union structure?                                               | y_n_na           |
| firmcou1      | Is there a works council?                                                                 | y_n_na           |
| firmcou2      | Is there a works / staff council?                                                         | y_n_na           |
| firminfl      | Do the trade unions influence the way the organisation is managed?                        | y_n_na           |
| firmequ1      | Is there an equal opportunity committee?                                                  | y_n_na           |
| firmrep4      | Is there an officer/employee association?                                                 | y_n_na           |
| firmrep8      | Are you allowed by your organization to join a trade union/association, if you so desire? | y_n_na           |
| jobpersp      | Do you have good career opportunities?                                                    | y_n_na           |
| jobfamil      | Are any of your co-workers family members?                                                | y_n_na           |
| firmre10      | Is there a Personnel or Human Resources department?                                       | y_n_na           |
| supvsex       | Is your direct supervisor male or female?                                                 |                  |
|               | Female                                                                                    | 1                |
|               | Male                                                                                      | 2                |
|               | Why are you without a job?                                                                |                  |
| break2        | Illness or occupational disability / accident / disease                                   | checkbox         |
| break3        | Unemployment / dismissed / inability to find a suitable job                               | checkbox         |
| break13       | I could not continue my own business                                                      | checkbox         |
| break14       | Seasonal work                                                                             | checkbox         |
| break15       | Short-time arrangements                                                                   | checkbox         |
| break1        | Caring for children over 1 year                                                           | checkbox         |
| break11       | Housekeeping.                                                                             | checkbox         |
| break12       | Caring for other members of household                                                     | checkbox         |

| VARIABLE NAME | SOURCE LABEL                                                                                              | RESPONSE/VALUE |
|---------------|-----------------------------------------------------------------------------------------------------------|----------------|
| break7        | Caring for other persons                                                                                  | checkbox       |
| break6        | Military service or equivalent.                                                                           | checkbox       |
| break5        | Other reasons                                                                                             | checkbox       |
| break19       | If break, did you have job protection during this period?                                                 |                |
|               | No                                                                                                        | 0              |
|               | Yes, part of the time                                                                                     | 1              |
|               | Yes, for the whole period                                                                                 | 2              |
|               | I don't know                                                                                              | -7             |
|               | If break, which income did you receive during this period?                                                |                |
| break14       | Unemployment benefit                                                                                      | checkbox       |
| break15       | Leave coverage                                                                                            | checkbox       |
| break16       | My partner / family provided for me                                                                       | checkbox       |
| break17       | Disability benefit                                                                                        | checkbox       |
| break20       | Only past savings                                                                                         | checkbox       |
| break21       | Lay off pay                                                                                               | checkbox       |
| break18       | Other                                                                                                     | checkbox       |
| breaknon      | None                                                                                                      | checkbox       |
| seekhisb      | If break, how long did it take you to find your first job after this period?                              |                |
|               | I returned to my previous employer                                                                        | 0              |
|               | I did not (have to) look for a job                                                                        | 1              |
|               | I started my own company / joined the family business                                                     | 9              |
|               | Less than 1 month                                                                                         | 2              |
|               | 1 - 3 months                                                                                              | 3              |
|               | 3 - 6 months                                                                                              | 4              |
|               | 0.5 - 1 year                                                                                              | 5              |
|               | 1 year or more                                                                                            | 6              |
|               | I don't know                                                                                              | -7             |
| seekhist      | If no break, how long did you spend looking for your first job?                                           |                |
|               | I did not look for a job                                                                                  | 0              |
|               | Less than 1 month                                                                                         | 1              |
|               | 1 - 3 months                                                                                              | 2              |
|               | 3 - 6 months                                                                                              | 3              |
|               | 0.5 - 1 year                                                                                              | 4              |
|               | 1 year or more                                                                                            | 5              |
|               | I don't know                                                                                              | -7             |
| occhist2      | If > 1 job, are you still working in the same business activity / industry as you were in your first job? | y_n            |
| occhist1      | If > 1 job, are you still working in the same occupation as in your first job?                            | y_n            |
| seekjob       | Have you looked for another job in the past four weeks?                                                   |                |
|               | No, I don't want to change jobs                                                                           | 1              |
|               | No, but I am interested in a new job                                                                      | 2              |
|               | Yes, but I have not found one yet                                                                         | 3              |
|               | Yes, and I have found one                                                                                 | 4              |
|               | If yes, how do you go about looking for another job?                                                      |                |
| sea1exam      | I do an official examination for a public post                                                            | checkbox       |
| seatraun      | Visit an employment center (trade unions agencies, ONG, churches and not-for-profit organisations)        | checkbox       |
| seanempl      | Visit a public / national employment agency                                                               | checkbox       |
| seafamil      | Ask family and acquaintances                                                                              | checkbox       |
| seainter      | Search a jobsite on the Internet                                                                          | checkbox       |
| seajnals      | Look in professional magazines                                                                            | checkbox       |
| seanwprs      | Via an advertisement / look in newspapers                                                                 | checkbox       |
| seapempl      | Visit a private employment agency                                                                         | checkbox       |
| seaphone      | Phone employers directly                                                                                  | checkbox       |
| seapucon      | Through public selection                                                                                  | checkbox       |
| searesum      | Send my CV to employers speculatively                                                                     | checkbox       |
| seascho3      | Via an apprenticeship / school                                                                            | checkbox       |
| seatemp       | Visit a temp agency                                                                                       | checkbox       |
| seaweb        | Through the Internet                                                                                      | checkbox       |

| VARIABLE NAME | SOURCE LABEL                                                                                  | RESPONSE/VALUE   |
|---------------|-----------------------------------------------------------------------------------------------|------------------|
|               | <b>In the past 12 months, has your organisation</b>                                           |                  |
| firmdis1      | Announced redundancies?                                                                       | y_n_na           |
| firmpri2      | Been privatised?                                                                              | y_n_na           |
| firmtra1      | Offered you training opportunities?                                                           | y_n_na           |
| firmreo1      | Faced reorganisation that has affected your workplace?                                        | y_n_na           |
| firmprot      | Faced an employee protest/strike?                                                             | y_n_na           |
| firminit      | Taken new strategic initiatives?                                                              | y_n_na           |
| firmreti      | Announced voluntary retirement?                                                               | y_n_na           |
| firmmerg      | Faced a merger with another organisation?                                                     | y_n_na           |
| firmcom1      | Renewed its computer equipment / machinery?                                                   | y_n_na           |
| firmstra      | Had a competent management strategy?                                                          | y_n_na           |
| firmbro1      | Been under immediate threat of bankruptcy?                                                    | y_n_na           |
|               | <b>What do you expect to happen in your organisation in the next 12 months?</b>               |                  |
| firmdism      | Announcement of redundancies                                                                  | y_n_na           |
| firmpri3      | Privatisation                                                                                 | y_n_na           |
| firmtra2      | Training opportunities will be offered                                                        | y_n_na           |
| firmreo2      | Reorganisation / organisational change                                                        | y_n_na           |
| firmmer2      | Merger with another organisation                                                              | y_n_na           |
| firmcom3      | Renewal of computer equipment / machinery                                                     | y_n_na           |
| firmstr2      | Competent management strategy                                                                 | y_n_na           |
| firmbro2      | Urgent threat of bankruptcy                                                                   | y_n_na           |
| firmi2        | New strategic initiatives                                                                     | y_n_na           |
| firmrecr      | Mass manpower recruitment                                                                     | y_n_na           |
| firmdis2      | Lay off/voluntary retirement                                                                  | y_n_na           |
| jobfutu1      | Do you expect to be with your current employer still in a year's time?                        | y_n_dk           |
| jobfutu2      | Do you expect to have a job in a year's time?                                                 | y_n_dk           |
| jobfutu3      | Do you expect to have your business still in a year's time?                                   | y_n_dk           |
| jobfutu4      | If yes, will this be in the same position?                                                    |                  |
|               | Yes, in the same position                                                                     | 1                |
|               | No, I will be promoted to a higher position                                                   | 2                |
|               | No, I will be working in another position                                                     | 3                |
|               | No, I will be demoted to a lower position                                                     | 4                |
| jobfutu5      | If no, why would this not be the case?                                                        |                  |
|               | I'll be working for another employer                                                          | 3                |
|               | I'll be caring for children                                                                   | 4                |
|               | I'll be doing domestic work                                                                   | 13               |
|               | I'll be in (early) retirement                                                                 | 5                |
|               | I'll be self-employed or working for a family business                                        | 6                |
|               | Because of health problems                                                                    | 7                |
|               | I'll be doing further training or study                                                       | 8                |
|               | I'll have been dismissed                                                                      | 9                |
|               | My contract will have expired                                                                 | 10               |
|               | My business will have gone                                                                    | 12               |
|               | My organisation's contract to provide the service may have expired                            | 20               |
|               | Other reasons                                                                                 | 11               |
|               | <b>What do you expect to happen in the next 12 months?</b>                                    |                  |
| jobprom3      | I am eager to get promoted                                                                    | y_n_na           |
| jobtasks      | My work responsibilities are likely to change                                                 | y_n_na           |
| jobloss       | My post is likely to be made redundant                                                        | y_n_na           |
| payrise       | I will get a pay rise.                                                                        | y_n_na           |
| prefjob       | I am eager to find a new job                                                                  | y_n_na           |
| comprai       | I will take computer courses to keep up with new demands at the workplace                     | y_n_na           |
| preflott      | I hope to win the lottery                                                                     | y_n_na           |
| payunsta      | My income is likely to be unstable and uncertain                                              | y_n_na           |
|               | <b>If you are/were looking for another job, how important would the following aspects be?</b> |                  |
| seekcomm      | Manageable commuting time                                                                     | importance5pt_na |
| seekdist      | Distance from the place I live now                                                            | importance5pt_na |
| seekflex      | Possibility to have flexitime or bank of hours                                                | importance5pt_na |

| VARIABLE NAME | SOURCE LABEL                                                                          | RESPONSE/VALUE   |
|---------------|---------------------------------------------------------------------------------------|------------------|
| seektra1      | Suitable training opportunities                                                       | importance5pt_na |
| seeksala      | Decent salary                                                                         | importance5pt_na |
| seekperm      | Permanent contract                                                                    | importance5pt_na |
| seekcoll      | Nice co-workers                                                                       | importance5pt_na |
| seekfame      | Employer's reputation                                                                 | importance5pt_na |
| seekpens      | Employer contributions to pension                                                     | importance5pt_na |
| seekday1      | Employer contributions to child care and health service                               | importance5pt_na |
| seekjobq      | Quality of job                                                                        | importance5pt_na |
| seekhrs       | Suitable working hours including possibility of flexitime/ part-time                  | importance5pt_na |
| seekstat      | Higher designation/social status                                                      | importance5pt_na |
| seektrav      | Opportunity to travel abroad                                                          | importance5pt_na |
| seekfrin      | Fringe benefits                                                                       | importance5pt_na |
| seekrewa      | Reward and recognition opportunity                                                    | importance5pt_na |
| seekpar1      | Part-time working hours                                                               | importance5pt_na |
| seekcond      | Better employment benefits such as higher wage, better wage prospects, other benefits | importance5pt_na |
| seekintc      | International career prospects                                                        | importance5pt_na |
| seekchal      | Challenging/ interesting job (for example more responsibilities)                      | importance5pt_na |
| seekpers      | Career prospects                                                                      | importance5pt_na |
| seekstres     | Less working pressure                                                                 | importance5pt_na |
| seekleav      | Suitable leave arrangements other than holidays                                       | importance5pt_na |
| seekcomb      | A better fit with family life                                                         | importance5pt_na |
| seekday2      | Firm's kindergarten/ employer contributions to child-care                             | importance5pt_na |
| seekcult      | Company culture                                                                       | importance5pt_na |
|               | More about your working hours                                                         |                  |
| hrshist1      | Have you always worked full-time?                                                     | y_n              |
| yyfullti      | If no, what year did you start working full-time?                                     | 1950_YEAR_NOW    |
| hrshist2      | Have you always worked part-time?                                                     | y_n              |
| yypartti      | If no, what year did you start working part-time?                                     | 1950_YEAR_NOW    |
| hrsresp       | Would you prefer to work more or less hours a week than you usually do?               |                  |
|               | No, I am satisfied with my current hours                                              | 0                |
|               | Less hours                                                                            | 1                |
|               | More hours                                                                            | 2                |
| hrscont4      | What sort of working hours have you agreed?                                           |                  |
| HINT          | If more options apply, please select the one that comes closest                       |                  |
|               | Full-time hours per week                                                              | 1                |
|               | Part-time hours per week                                                              | 2                |
|               | Annualised hours                                                                      | 3                |
|               | Flexible hours                                                                        | 4                |
|               | I work on call                                                                        | 6                |
|               | Other                                                                                 | 99               |
|               | Why do you work part-time?                                                            |                  |
| hrsptedu      | Still in education/training                                                           | y_n              |
| hrspthou      | Housekeeping                                                                          | y_n              |
| hrsptchl      | Looking after children or other persons                                               | y_n              |
| hrspttim      | Time for myself                                                                       | y_n              |
| hrsptsec      | Second job                                                                            | y_n              |
| hrspthea      | Health problems, personal illness or disability                                       | y_n              |
| hrsptret      | Early retirement, retirement                                                          | y_n              |
| hrsptnof      | Cannot find a full-time job                                                           | y_n              |
| hrsptdem      | Job too stressful or demanding for full-time                                          | y_n              |
| hrsppolt      | Policy issues                                                                         | y_n              |
| hrscont5      | How many hours per year do you work under the terms of your contract?                 | 0.15-100.45      |
| hrscont6      | Is a minimum or maximum of working hours per week agreed with your employer?          |                  |
|               | A minimum and a maximum                                                               | 1                |
|               | A minimum                                                                             | 2                |
|               | A maximum                                                                             | 3                |
|               | No                                                                                    | 0                |

| VARIABLE NAME | SOURCE LABEL                                                                              | RESPONSE/VALUE   |
|---------------|-------------------------------------------------------------------------------------------|------------------|
|               | Not applicable                                                                            | -8               |
| hrscont7      | How many hours a week do you work under the terms of your contract?                       | 0.15-100.45      |
| wageotim      | If you work more hours than laid down in your contract, how is this overtime compensated? |                  |
|               | Overtime paid as normal hours plus overtime premium                                       | 1                |
|               | Overtime paid as normal hours                                                             | 2                |
|               | Time-off in lieu for overtime hours                                                       | 3                |
|               | Partly paid, partly compensated with time-off in lieu                                     | 4                |
|               | Not compensated                                                                           | 5                |
|               | I don't know                                                                              | -7               |
|               | Not applicable                                                                            | -8               |
| hrslunch      | Is your lunchtime included in your agreed working hours?                                  | y_n_dk_na        |
| tishift3      | The type of shifts or irregular hours you work are                                        |                  |
|               | Alternating morning / afternoon shifts                                                    | 2                |
|               | Rotating shifts, not including nights and weekends                                        | 221              |
|               | Rotating shifts, including weekends but no nights                                         | 222              |
|               | Alternating morning / afternoon / night shifts                                            | 3                |
|               | Rotating shifts, including nights and weekends                                            | 331              |
|               | Rotating shifts, including nights but no weekends                                         | 332              |
|               | Daily split shifts                                                                        | 23               |
|               | Morning shifts                                                                            | 9                |
|               | Afternoon shifts                                                                          | 8                |
|               | Evening shifts                                                                            | 7                |
|               | Night shifts                                                                              | 12               |
|               | Other schedules                                                                           | 99               |
|               | How are your working hours organised?                                                     |                  |
| tihomtel      | I work at home at least one day a week (telework)                                         | y_n_na           |
| tiroste7      | I know my working hours at least one month in advance                                     | y_n_na           |
| tiroste8      | I know my working hours at best one week in advance                                       | y_n_na           |
| tirost10      | My supervisor often asks me to change my working hours                                    | y_n_na           |
| tiroste9      | I can easily swap shifts with co-workers                                                  | y_n_na           |
|               | How often do you find that                                                                |                  |
| ddrun17       | Your supervisor changes your working hours at short notice                                | neverdaily5pt_na |
| ticonfli      | Your working hours conflict with your family commitments                                  | neverdaily5pt_na |
| ddrun18       | There is no work available for you                                                        | neverdaily5pt_na |
| preftel1      | You wish you could work at home now and then (telework)                                   | neverdaily5pt_na |
| ddrun16       | You are unable to take a lunch break                                                      | neverdaily5pt_na |
| ddrun15       | You unexpectedly have to work overtime                                                    | neverdaily5pt_na |
| conspeed      | You have to work at very high speed                                                       | neverdaily5pt_na |
| tideadli      | You have to work to tight deadlines                                                       | neverdaily5pt_na |
| hrschang      | Over the 12 past months, have your agreed working hours changed?                          |                  |
|               | No                                                                                        | 0                |
|               | Yes, to less hours                                                                        | 1                |
|               | Yes, to more hours                                                                        | 2                |
|               | Yes, to flexible hours                                                                    | 3                |
|               | Yes, other                                                                                | 4                |
|               | Not applicable                                                                            | -8               |
| hrschan1      | If yes, was this                                                                          |                  |
|               | On your request                                                                           | 1                |
|               | Due to reducing the standard working week with loss of pay                                | 2                |
|               | Due to reducing the standard working week without loss of pay                             | 3                |
|               | Vanwege deeltijd WW                                                                       | 5                |
|               | Due to other reasons                                                                      | 4                |
| ddwork1       | In the past seven days, have you worked your usual number of hours?                       |                  |
|               | Yes                                                                                       | 1                |
|               | No, I worked more hours                                                                   | 2                |
|               | No, I worked less hours                                                                   | 3                |
|               | No, I have not worked at all due to                                                       | 4                |
|               | Why have you worked less hours or not at all?                                             |                  |

| VARIABLE NAME | SOURCE LABEL                                                                                              | RESPONSE/VALUE |
|---------------|-----------------------------------------------------------------------------------------------------------|----------------|
| ddworvac      | Vacation / days off                                                                                       | checkbox       |
| ddworill      | Illness or injury                                                                                         | checkbox       |
| ddworfam      | Family reasons                                                                                            | checkbox       |
| ddworedu      | Training course                                                                                           | checkbox       |
| ddworsho      | Short-time working                                                                                        | checkbox       |
| ddwordis      | Labour dispute / industrial action                                                                        | checkbox       |
| ddworwea      | Weather conditions                                                                                        | checkbox       |
| ddworloo      | I was looking for a job                                                                                   | checkbox       |
| ddworlea      | Maternity / parental leave                                                                                | checkbox       |
| ddworsea      | Seasonal work                                                                                             | checkbox       |
| ddworsen      | Seniority leave                                                                                           | checkbox       |
| ddworvar      | Variable working hours / time off in lieu of wages                                                        | checkbox       |
| ddworoth      | Other reasons                                                                                             | checkbox       |
| confixed      | What is the duration of your contract?                                                                    | checkbox       |
|               | 1 - 2 days                                                                                                | 1              |
|               | 3 - 6 days                                                                                                | 2              |
|               | 1 - 4 weeks                                                                                               | 3              |
|               | 1 - 3 months                                                                                              | 4              |
|               | 3 - 6 months                                                                                              | 5              |
|               | 0.5 - 1 year                                                                                              | 6              |
|               | 1 - 2 years                                                                                               | 7              |
|               | 2 years or more                                                                                           | 8              |
|               | Until a task is completed                                                                                 | 13             |
|               | Not agreed                                                                                                | 9              |
|               | Not applicable                                                                                            | -8             |
| confixe1      | When your contract comes to an end, what are your prospects with your current employer?                   |                |
|               | I expect to become permanently employed                                                                   | 1              |
|               | I expect to sign a new fixed-term contract with the same employer                                         | 2              |
|               | My contract will not be renewed, so I will lose my present job                                            | 3              |
|               | I don't know                                                                                              | -7             |
|               | Other                                                                                                     | 99             |
|               | A fixed-term contract                                                                                     |                |
| confiski      | Gives me the opportunity to increase my skills                                                            | agree5pt_na    |
| confiexp      | Gives me the opportunity to build up work experience                                                      | agree5pt_na    |
| confipen      | Restricts my capacity to build up a pension                                                               | agree5pt_na    |
| confihou      | Restricts my ability to buy a house                                                                       | agree5pt_na    |
| confipar      | Forces me to stay with my parents                                                                         | agree5pt_na    |
| confichi      | Forces me to postpone having children                                                                     | agree5pt_na    |
| confiper      | Is the only option because permanent work is not available                                                | agree5pt_na    |
| confiemp      | Gives me the opportunity to look for the best employer                                                    | agree5pt_na    |
| wageflex      | Now we want to ask about your LAST wage. Was your last wage dependent on your individual performance from |                |
|               | Piece work                                                                                                | 1              |
|               | Sales targets                                                                                             | 2              |
|               | Customers, patients                                                                                       | 3              |
|               | Agricultural output                                                                                       | 4              |
|               | Other                                                                                                     | 99             |
|               | None of these                                                                                             | 0              |
| wageba1       | Did you receive a basic wage?                                                                             | y_n            |
| wageba2       | What was the basic part of your last wage?                                                                | amount         |
|               | In the past 12 months have you been a participant in the following work related schemes or benefits?      |                |
| pastuapp      | Apprenticeship                                                                                            | checkbox       |
| pastudys      | Education or training scheme                                                                              | checkbox       |
| papleav1      | Maternity / parental leave scheme (above statutory minimum)                                               | checkbox       |
| papleav       | Maternity / parental leave scheme                                                                         | checkbox       |
| padaycre      | Company-based day care / creche                                                                           | checkbox       |
| paleasav      | Leave accumulation scheme / time-banking                                                                  | checkbox       |



| VARIABLE NAME | SOURCE LABEL                                                                                                                                                             | RESPONSE/VALUE |
|---------------|--------------------------------------------------------------------------------------------------------------------------------------------------------------------------|----------------|
| pacredit      | Preferential credits                                                                                                                                                     | checkbox       |
| pachoice      | Flexible Benefit Plan                                                                                                                                                    | checkbox       |
| pawotime      | Working time experiment                                                                                                                                                  | checkbox       |
| patelewo      | Telework scheme                                                                                                                                                          | checkbox       |
| paearlyr      | (Partial) early retirement scheme                                                                                                                                        | checkbox       |
| pahrsre2      | Arrangement to work shorter hours (such as for working parents)                                                                                                          | checkbox       |
| pahrsre1      | Statutory entitlement to shorter working hours                                                                                                                           | checkbox       |
| frpare61      | Contribution to parent's day-care                                                                                                                                        | checkbox       |
| frfree61      | Additional free days                                                                                                                                                     | checkbox       |
|               | <b>What do you think about your terms and conditions of employment?</b>                                                                                                  |                |
| paypoli       | I am satisfied with my employer's approach to pay.                                                                                                                       | agree5pt_na    |
| paytime       | I am confident that I will be paid on time.                                                                                                                              | agree5pt_na    |
| paycost       | I am confident that my wage will keep up with the cost of living.                                                                                                        | agree5pt_na    |
| payhilow      | The gap between high and low pay is too great at my place of work.                                                                                                       | agree5pt_na    |
| paymore       | I should earn more, considering my performance.                                                                                                                          | agree5pt_na    |
| satbonus      | I am satisfied with my allowances / bonuses.                                                                                                                             | agree5pt_na    |
| satcontr      | I am satisfied with my kind of contract.                                                                                                                                 | agree5pt_na    |
| pensworr      | I am worried about my pension.                                                                                                                                           | agree5pt_na    |
|               | <b>More about your household</b>                                                                                                                                         |                |
| hhowno2       | Is your home owned or rented?                                                                                                                                            |                |
|               | Self-owned without loan                                                                                                                                                  | 11             |
|               | I/We own our home                                                                                                                                                        | 1              |
|               | I/We pay rent                                                                                                                                                            | 2              |
|               | My/Our accommodation is provided rent-free                                                                                                                               | 3              |
|               | I/We live in company housing                                                                                                                                             | 4              |
|               | I/We own our home, but are still paying off the loan                                                                                                                     | 6              |
|               | I/We live in the house owned by parents                                                                                                                                  | 7              |
|               | Institution                                                                                                                                                              | 12             |
|               | Other                                                                                                                                                                    | 99             |
| hhparact      | What is your partner's principal activity?                                                                                                                               |                |
|               | Employee on permanent contract                                                                                                                                           | 146            |
|               | Employee on fixed-term contract                                                                                                                                          | 147            |
|               | Self-employed, employer, own-account worker, freelance                                                                                                                   | 202            |
|               | Paid family worker / working for family business                                                                                                                         | 103            |
|               | Working without pay (family business or farm)                                                                                                                            | 306            |
|               | Unpaid voluntary worker                                                                                                                                                  | 307            |
|               | Housewife, househusband                                                                                                                                                  | 308            |
|               | Unemployed                                                                                                                                                               | 410            |
|               | Disabled, ill                                                                                                                                                            | 515            |
|               | In education                                                                                                                                                             | 620            |
|               | Retired                                                                                                                                                                  | 916            |
|               | In a job creation scheme                                                                                                                                                 | 130            |
|               | In military or comparable services                                                                                                                                       | 131            |
|               | Other                                                                                                                                                                    | 950            |
| hhhrspa       | How many hours a week does your partner usually work?                                                                                                                    | 0.15-100.45    |
| hhincome      | What is the usual total net MONTHLY income of your household?                                                                                                            | amount         |
| HINT          | This is the combined income of all members of the household and may include benefits or other income. Please enter an average if this income varies from month to month. |                |
|               | <b>How are household chores divided at home?</b>                                                                                                                         |                |
| hhrespin      | I am the person who contributes most to household income                                                                                                                 | y_n_na         |
| hhresphh      | I am the person who is responsible for most of the household chores                                                                                                      | y_n_na         |
| hhhomehe      | I/We have paid domestic help                                                                                                                                             | y_n_na         |
| hhshoti1      | I generally have enough time for my household chores                                                                                                                     | y_n_na         |
| hhargume      | We often have arguments about the division of household chores                                                                                                           | y_n_na         |
| hhtimere      | I am trying to cut down the time I spend on household chores                                                                                                             | y_n_na         |
| hhwofato      | I often find it hard to combine work and family life.                                                                                                                    | y_n_na         |
| hhgrowfo      | Our household grows its own food                                                                                                                                         | y_n_na         |
| hhmutual      | We have developed a mutual understanding about sharing household chores                                                                                                  | y_n_na         |

| VARIABLE NAME | SOURCE LABEL                                                     | RESPONSE/VALUE     |
|---------------|------------------------------------------------------------------|--------------------|
| hrshkeep      | How many hours per week do you spend on housekeeping?            | 0.15-100.45        |
| hrshelp       | How many hours of paid domestic help a week do you have?         | 0.15-100.45        |
|               | Finally, how satisfied are you with                              |                    |
| sathhinc      | Your household income                                            | satisfaction5pt_na |
| sathealt      | Your health                                                      | satisfaction5pt_na |
| sathous       | Your housing                                                     | satisfaction5pt_na |
| satleisu      | The amount of leisure time you have                              | satisfaction5pt_na |
| sathhdiv      | The division of household chores                                 | satisfaction5pt_na |
| satwelfa      | Welfare provisions                                               | satisfaction5pt_na |
|               | About this questionnaire                                         |                    |
| survetxt      | If you have any comments on the questionnaire please do so here. | text               |
| prize         | Do you want to win the prize?                                    | y_n                |
| nextyear      | Are you prepared to complete next year's questionnaire?          | y_n                |

\*\*\*\*\*
